# Supplementary material
Source: PubMed Central journal article supplement (PMC1584277)
Supplement: pgen.0020144.sg002.pdf [file pgen.0020144.sg002.pdf]

Chromosome 2

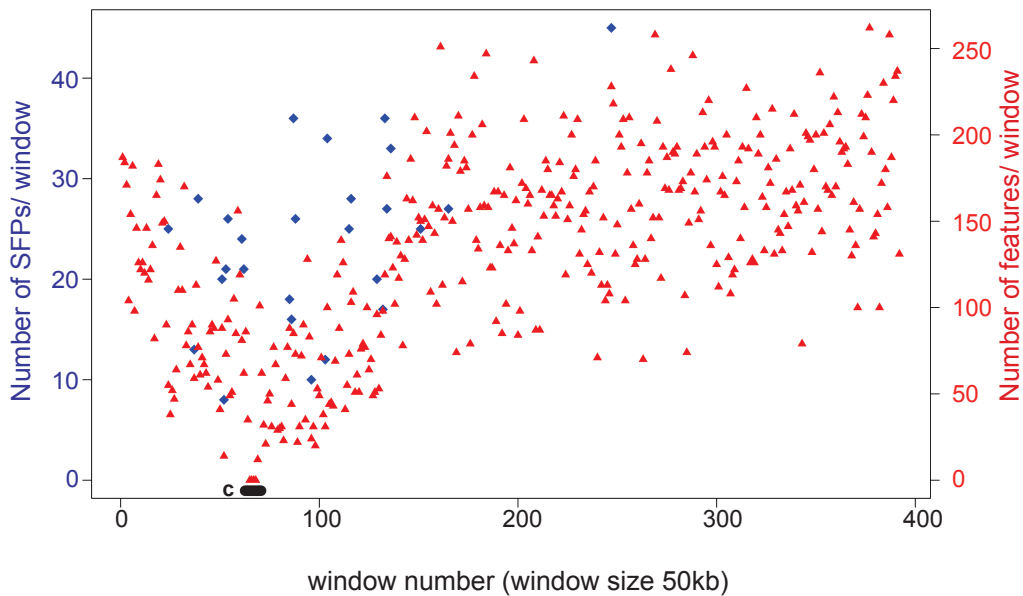

Chromosome 3

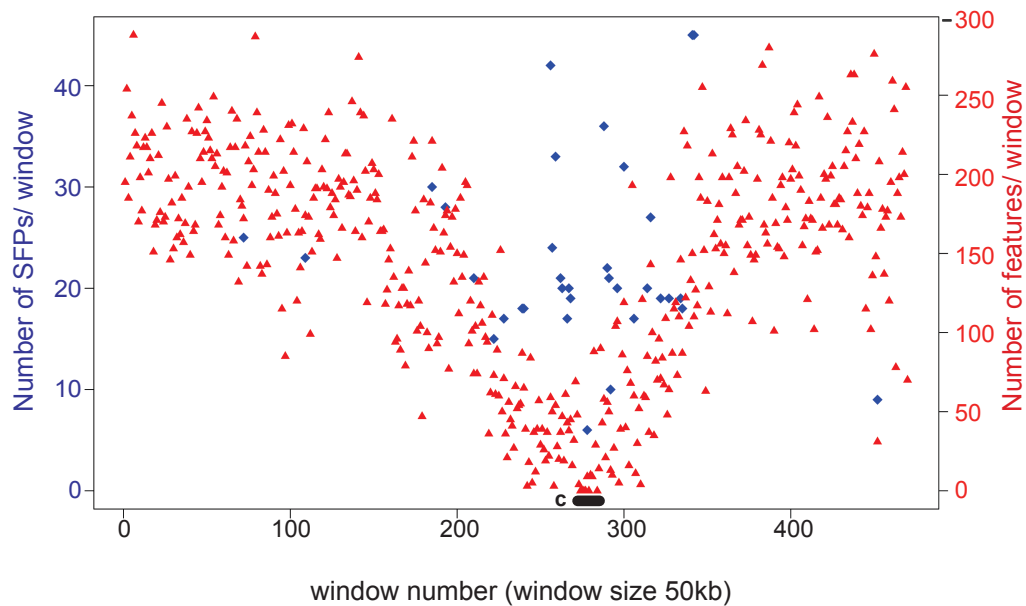

Chromosome 4

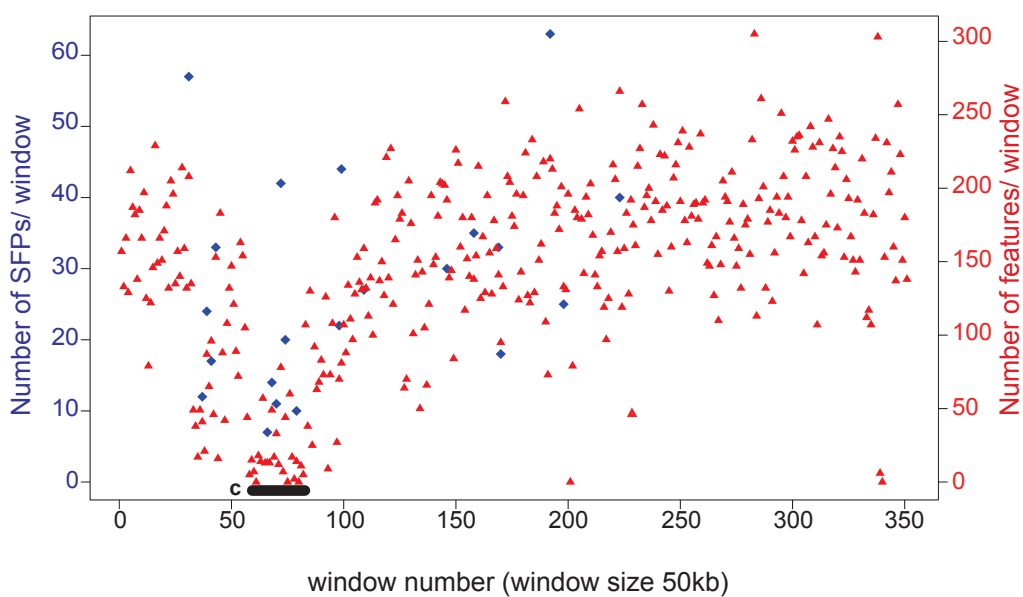

Chromosome 5

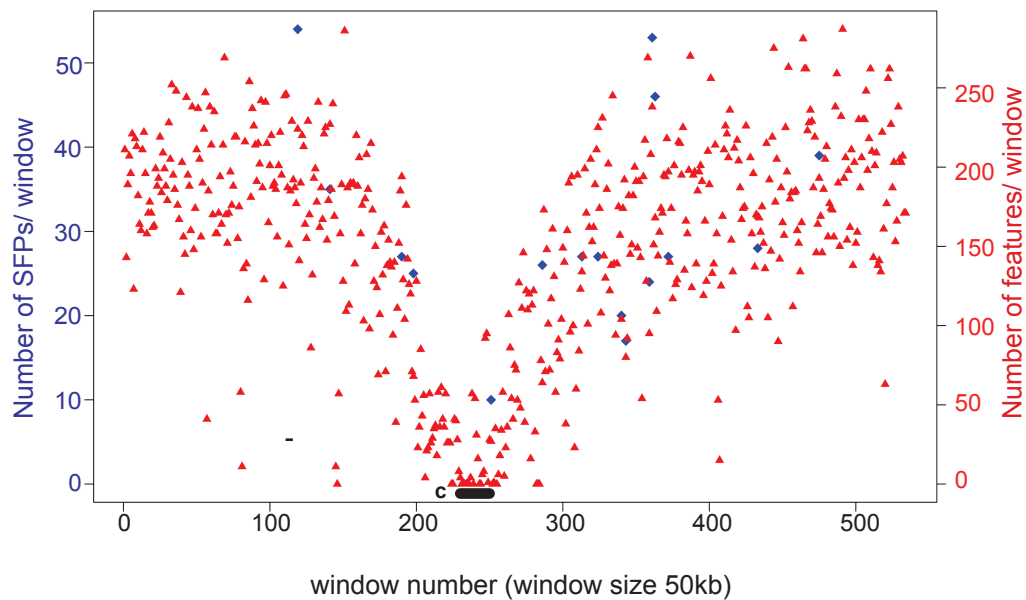

▲ probes  
 ◆ windows with significant higher SFP density ( $p < 0.05$ )  
 c centromere
