# Supplementary material
Source: PubMed Central journal article supplement (PMC1584277)

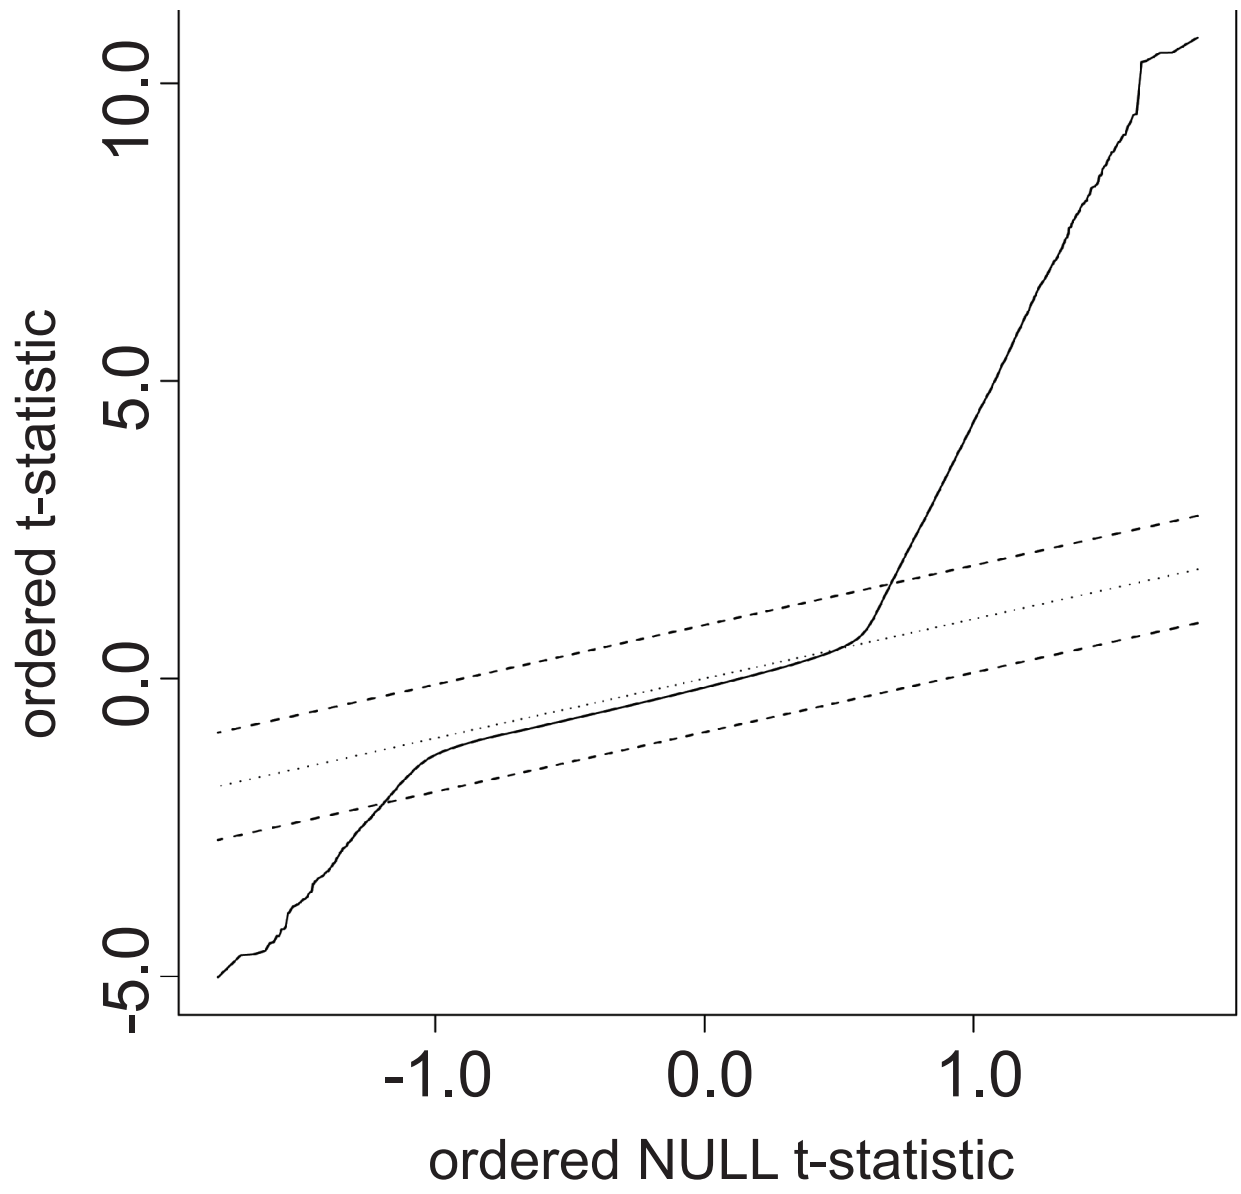

Supplemental Figure 1

Supplement: pgen.0020144.sg001.pdf [file pgen.0020144.sg001.pdf]

# Chromosome 1

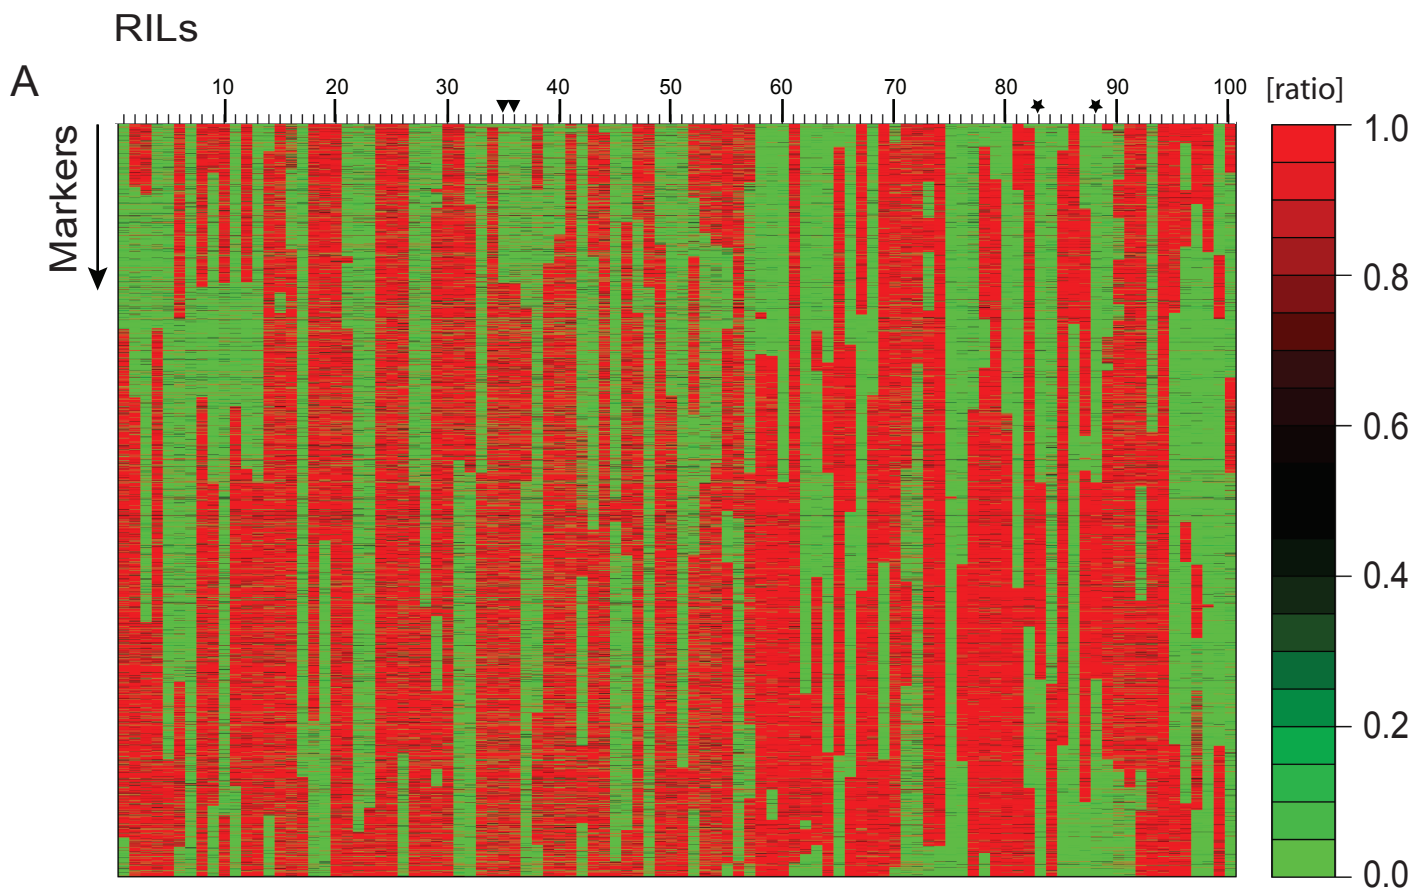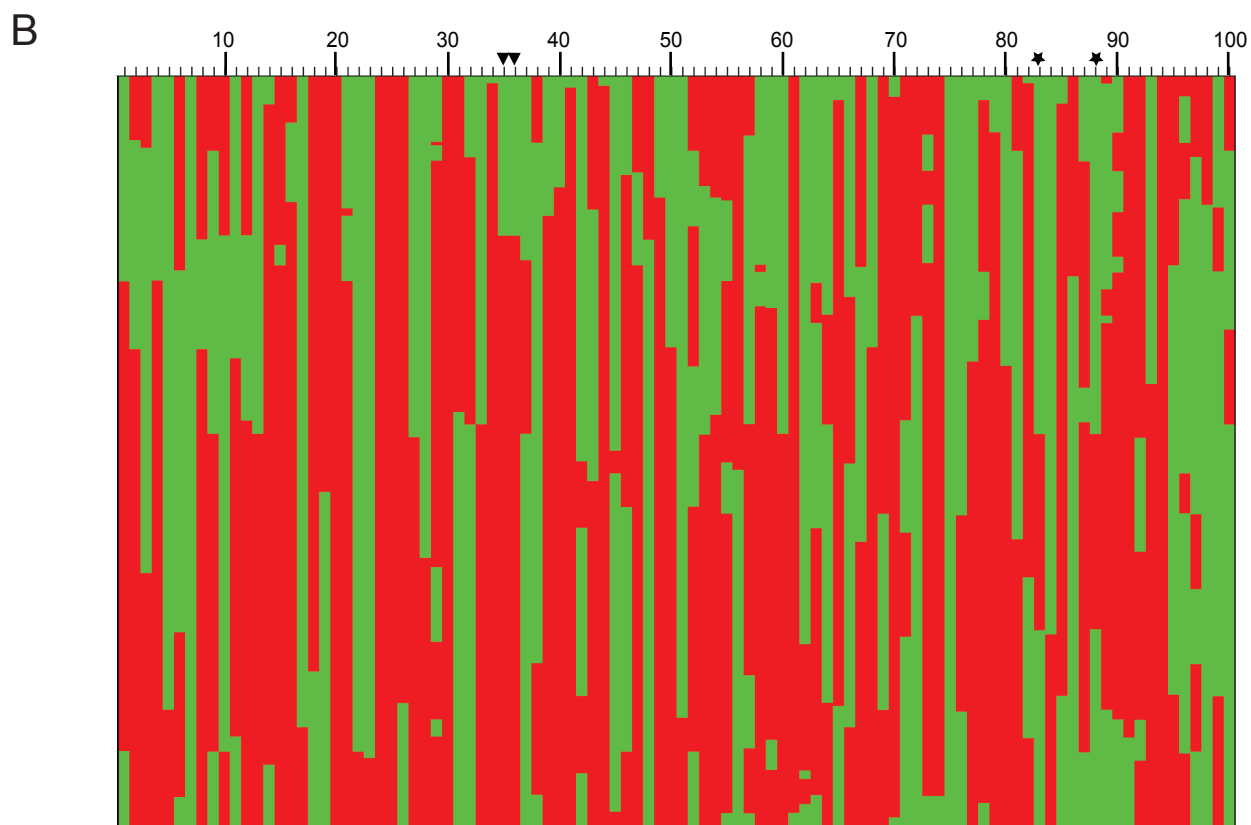

Col Ler

Supplement: pgen.0020144.sg003.pdf [file pgen.0020144.sg003.pdf]

# Chromosome 2

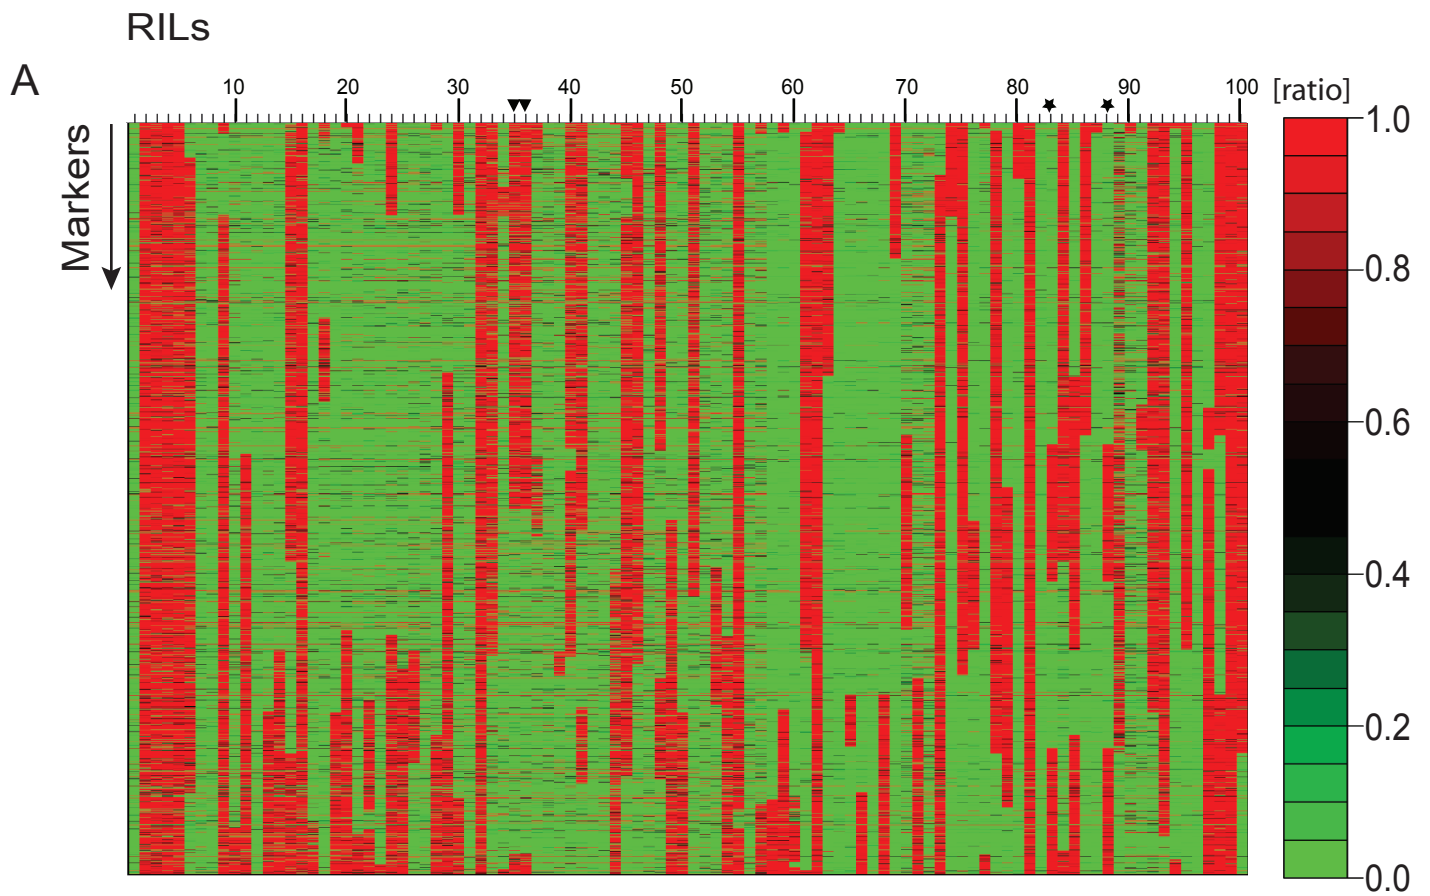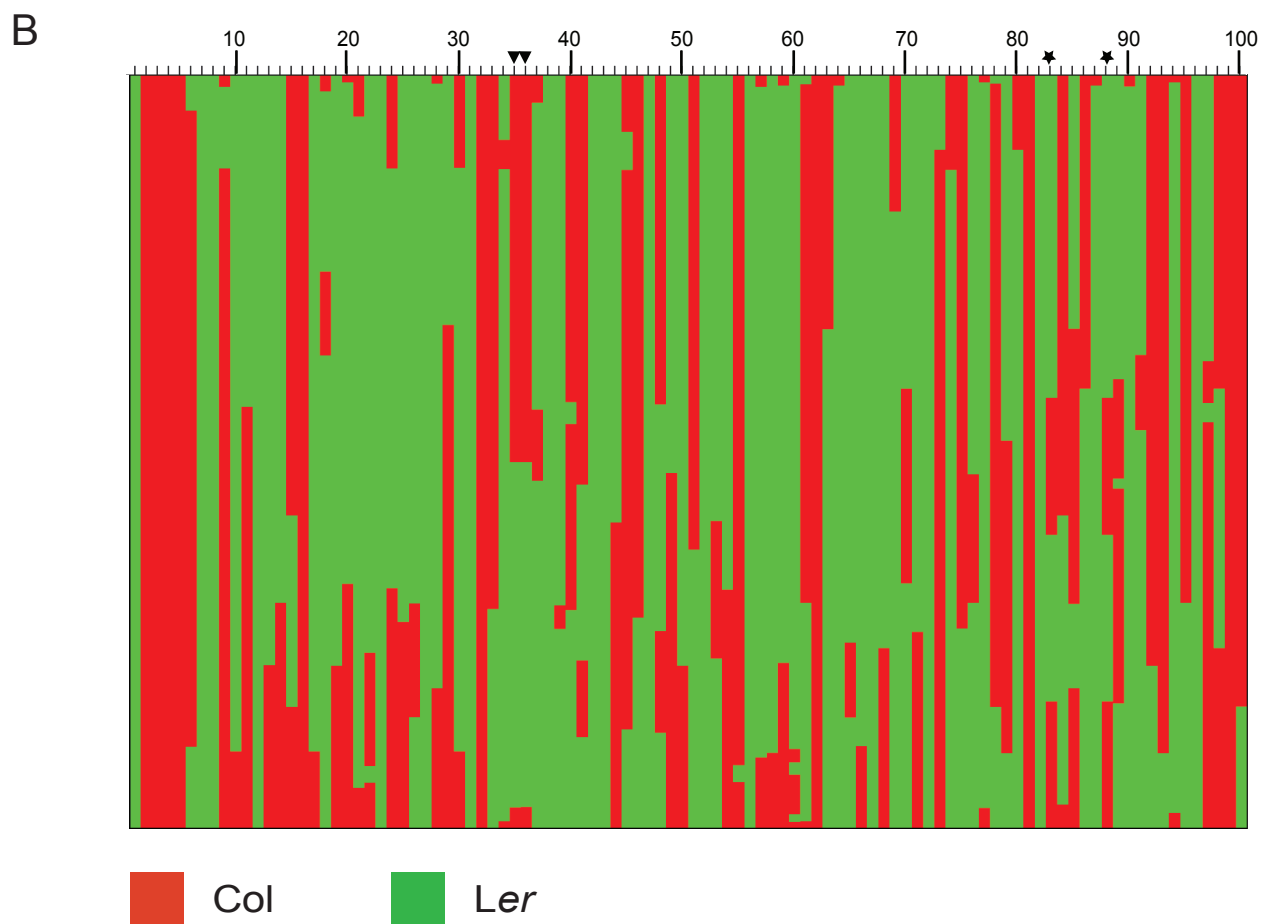

Supplement: pgen.0020144.sg004.pdf [file pgen.0020144.sg004.pdf]

# Chromosome 3

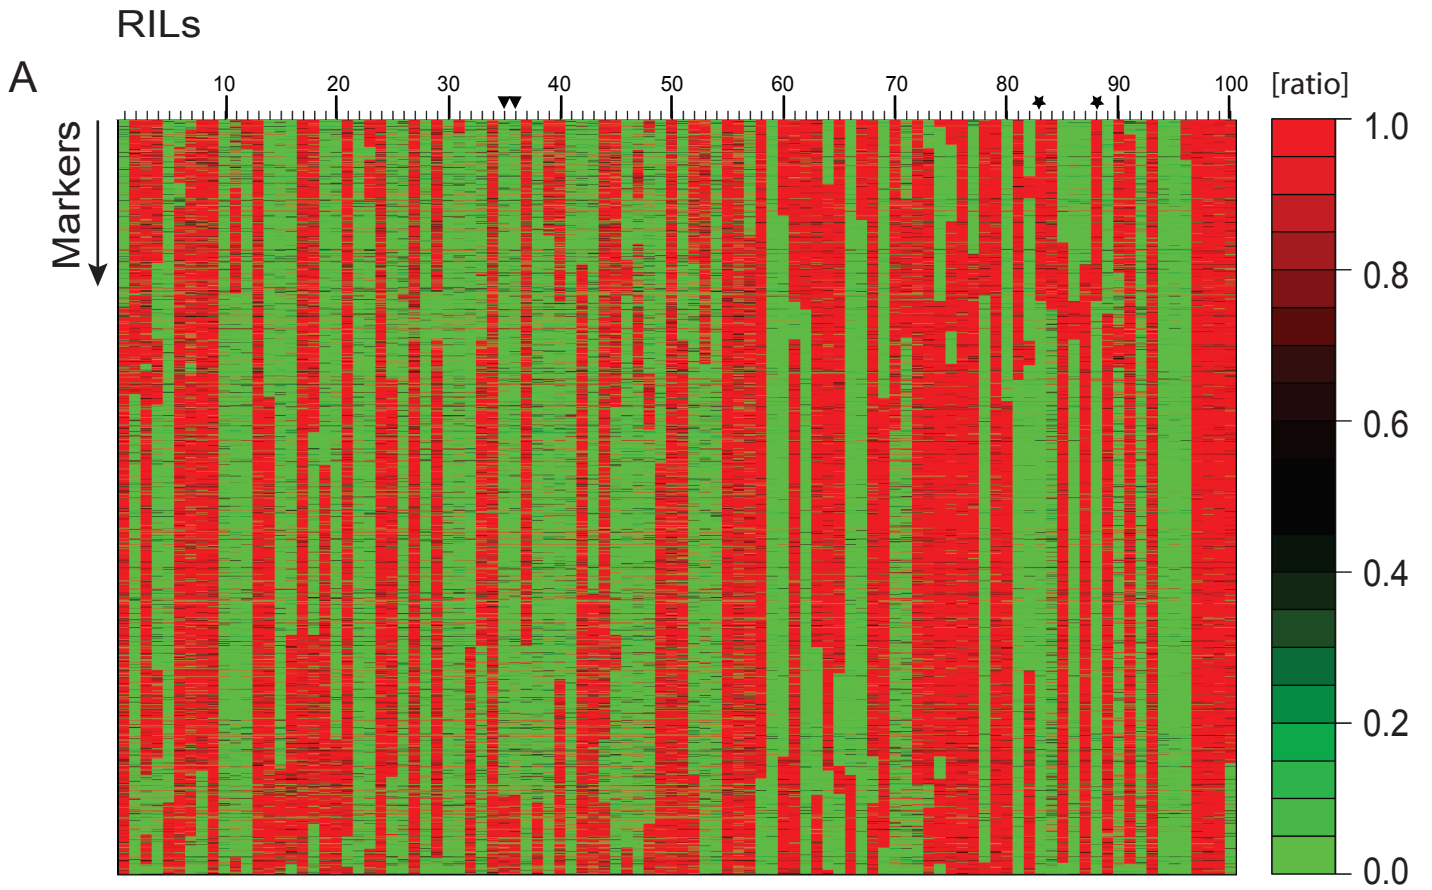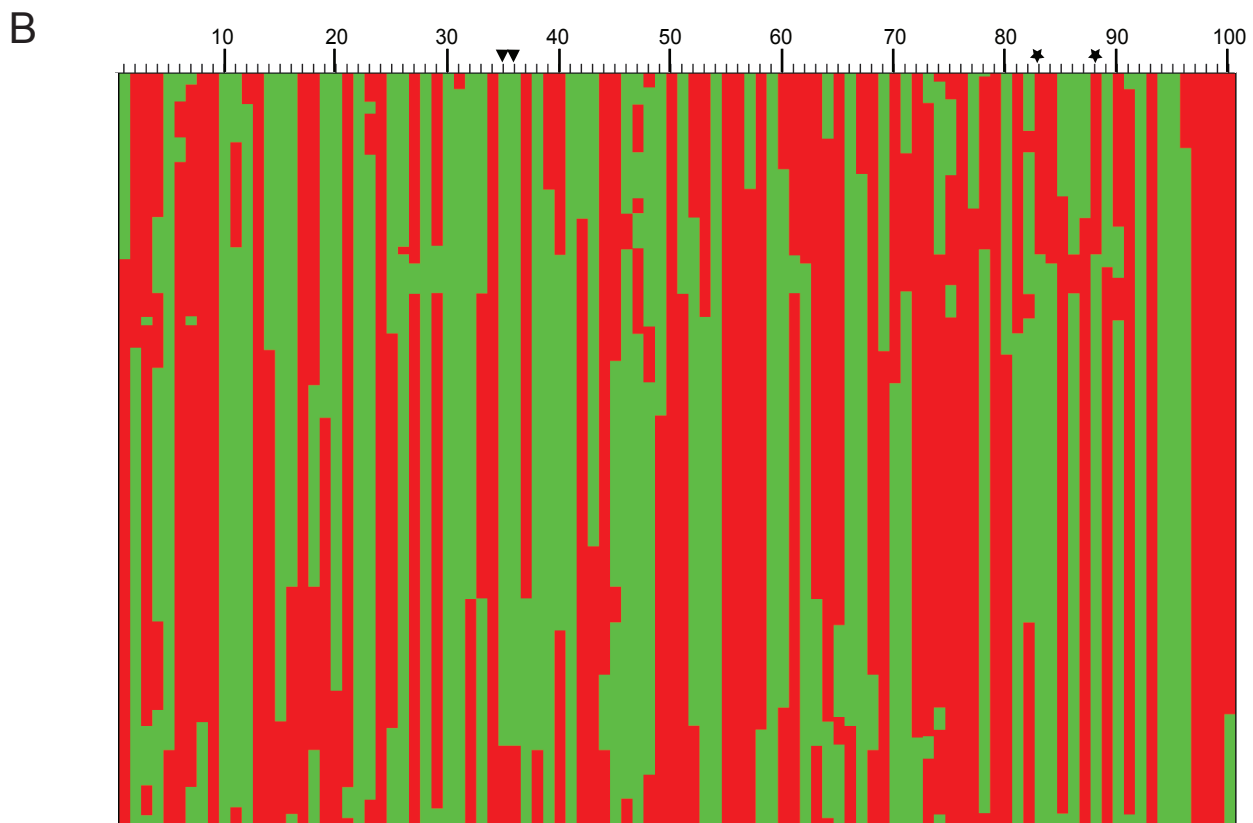

Col Ler

Supplement: pgen.0020144.sg005.pdf [file pgen.0020144.sg005.pdf]

# Chromosome 4

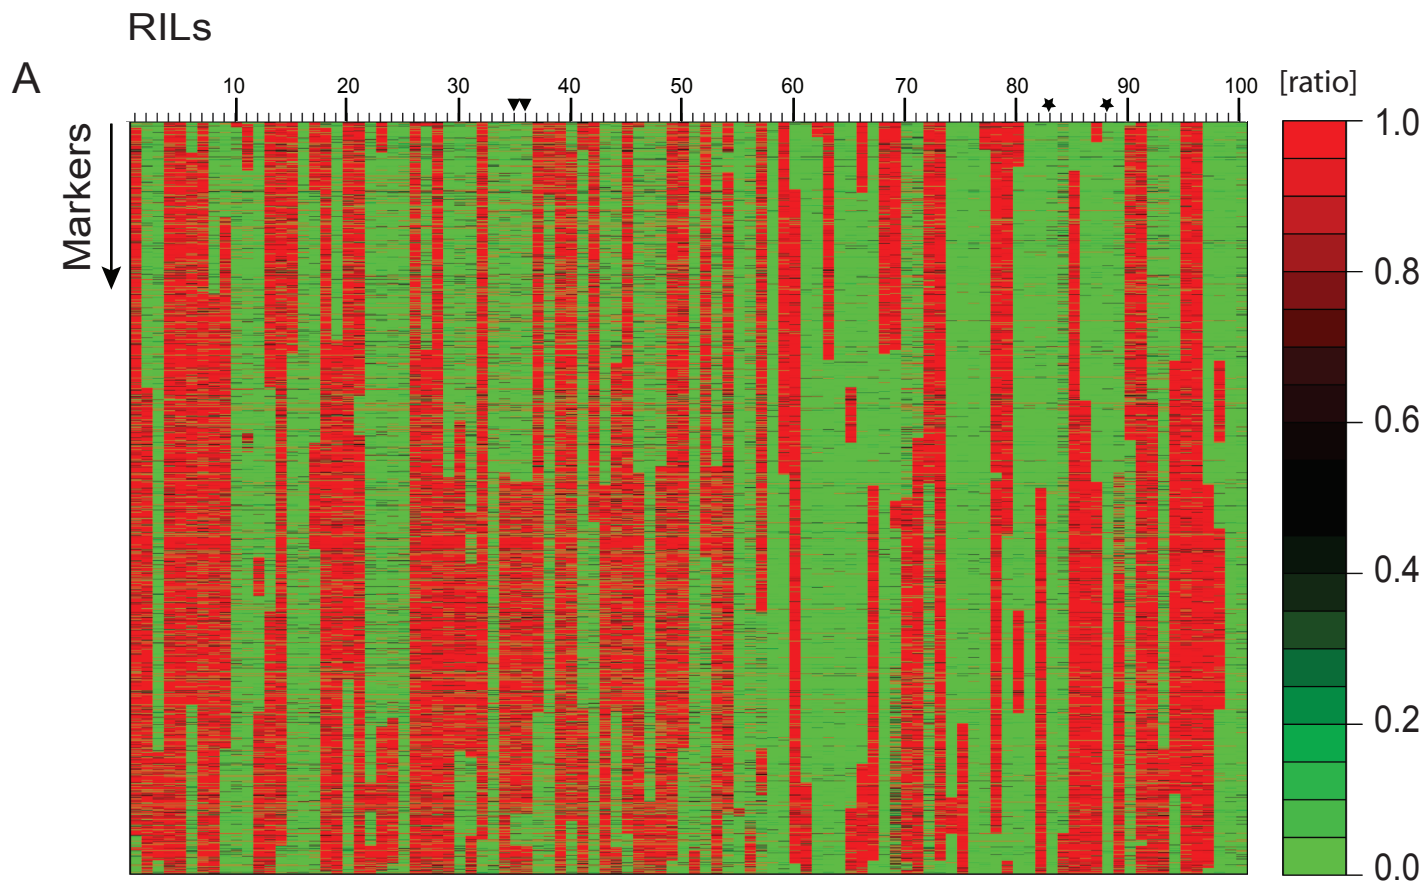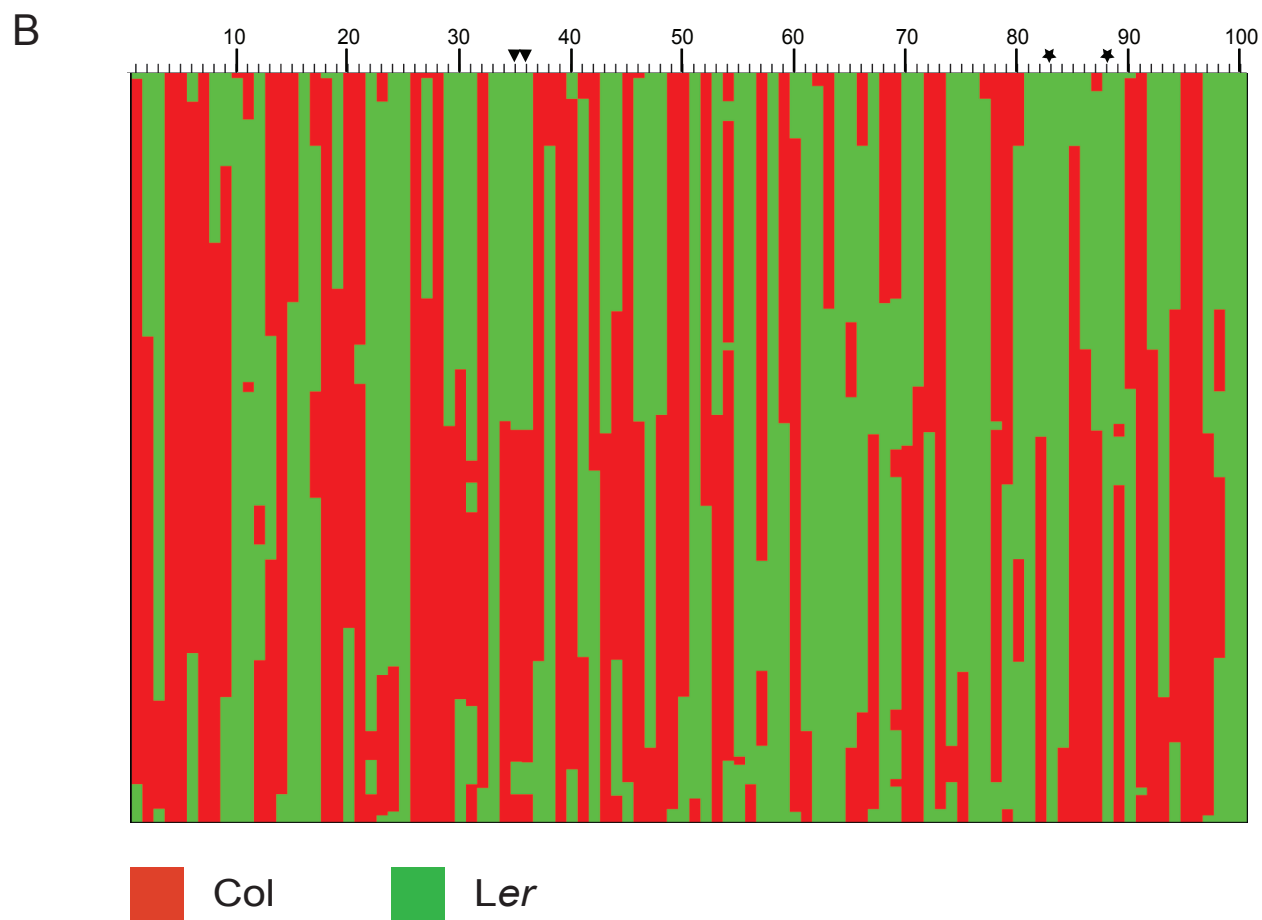

Supplement: pgen.0020144.sg006.pdf [file pgen.0020144.sg006.pdf]

# Chromosome 5

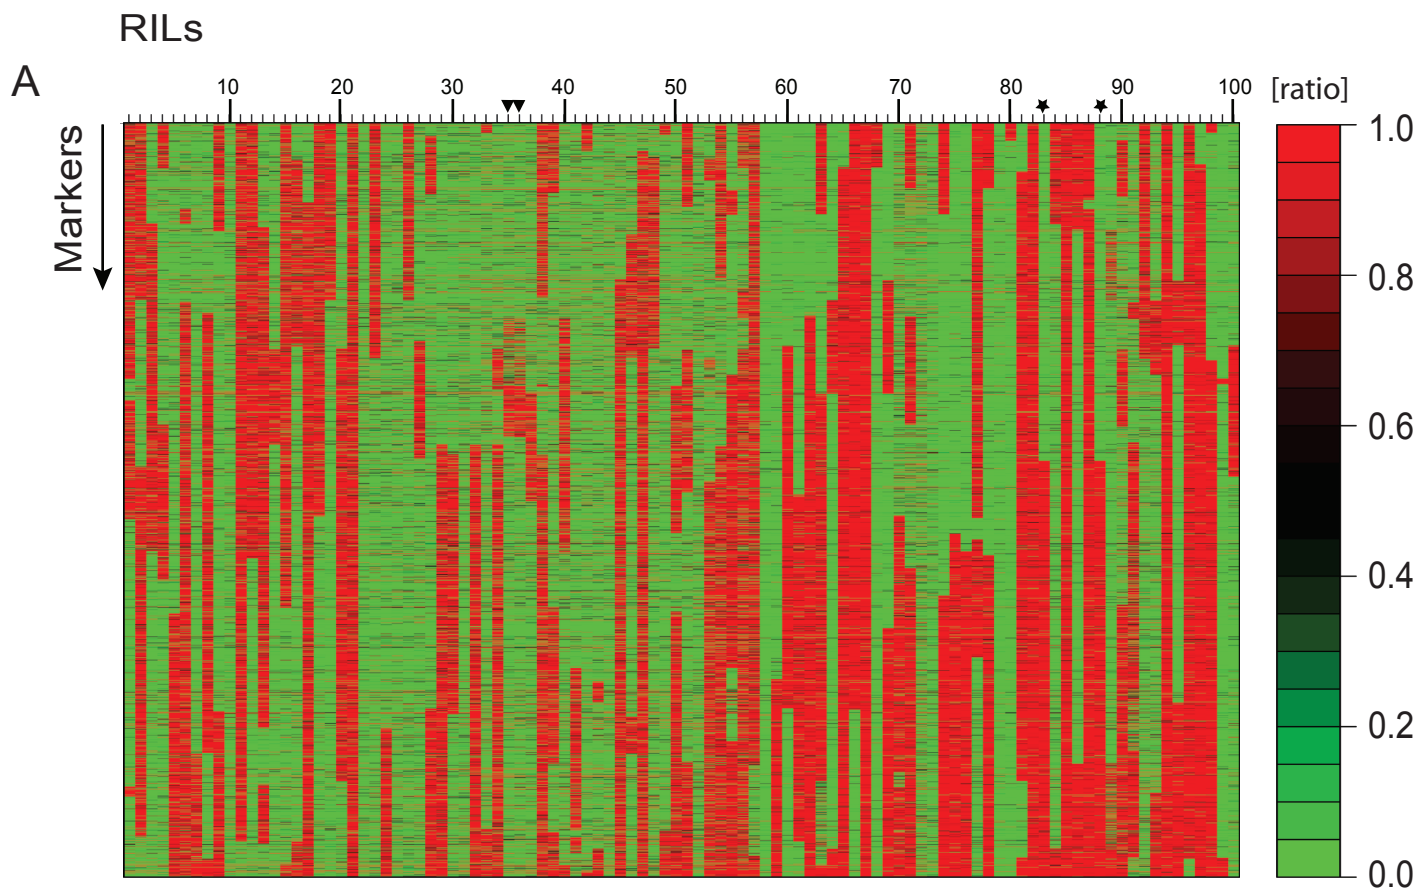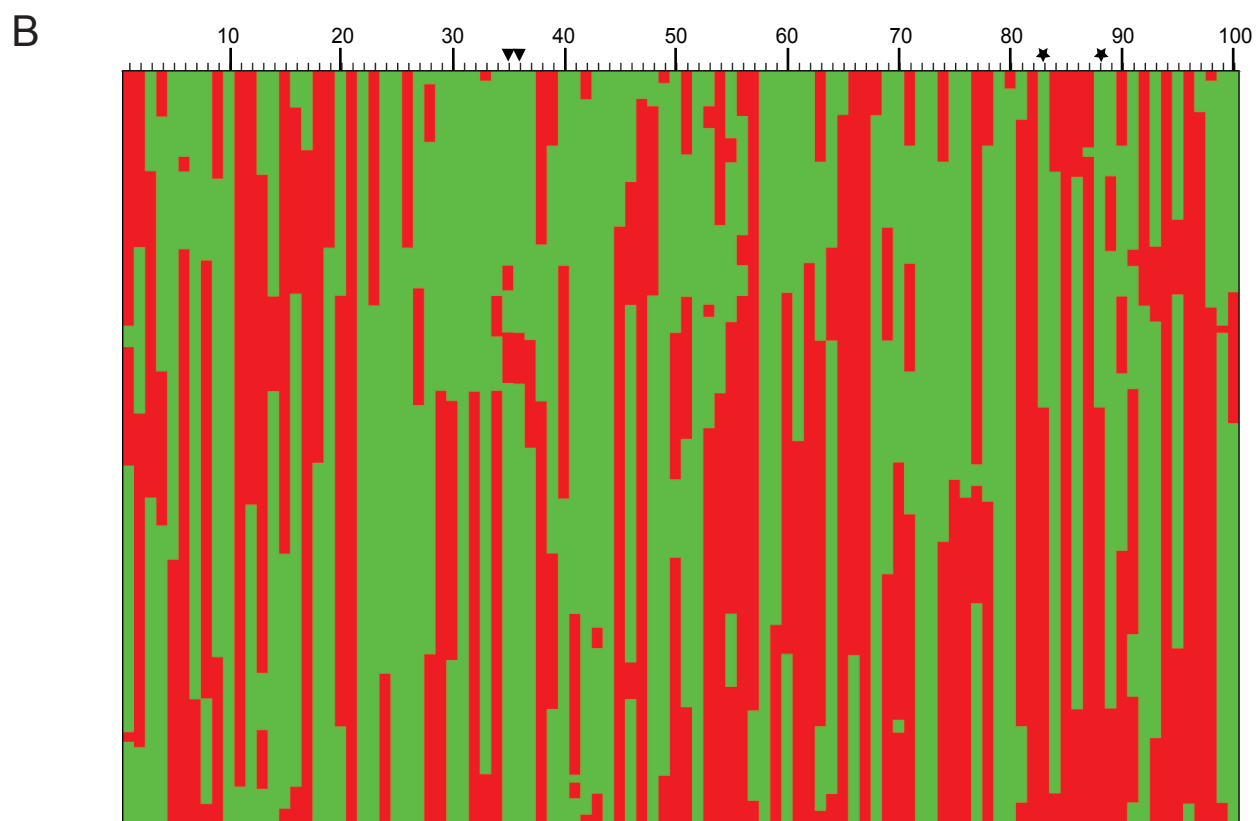

Col Ler

Supplement: pgen.0020144.sg007.pdf [file pgen.0020144.sg007.pdf]

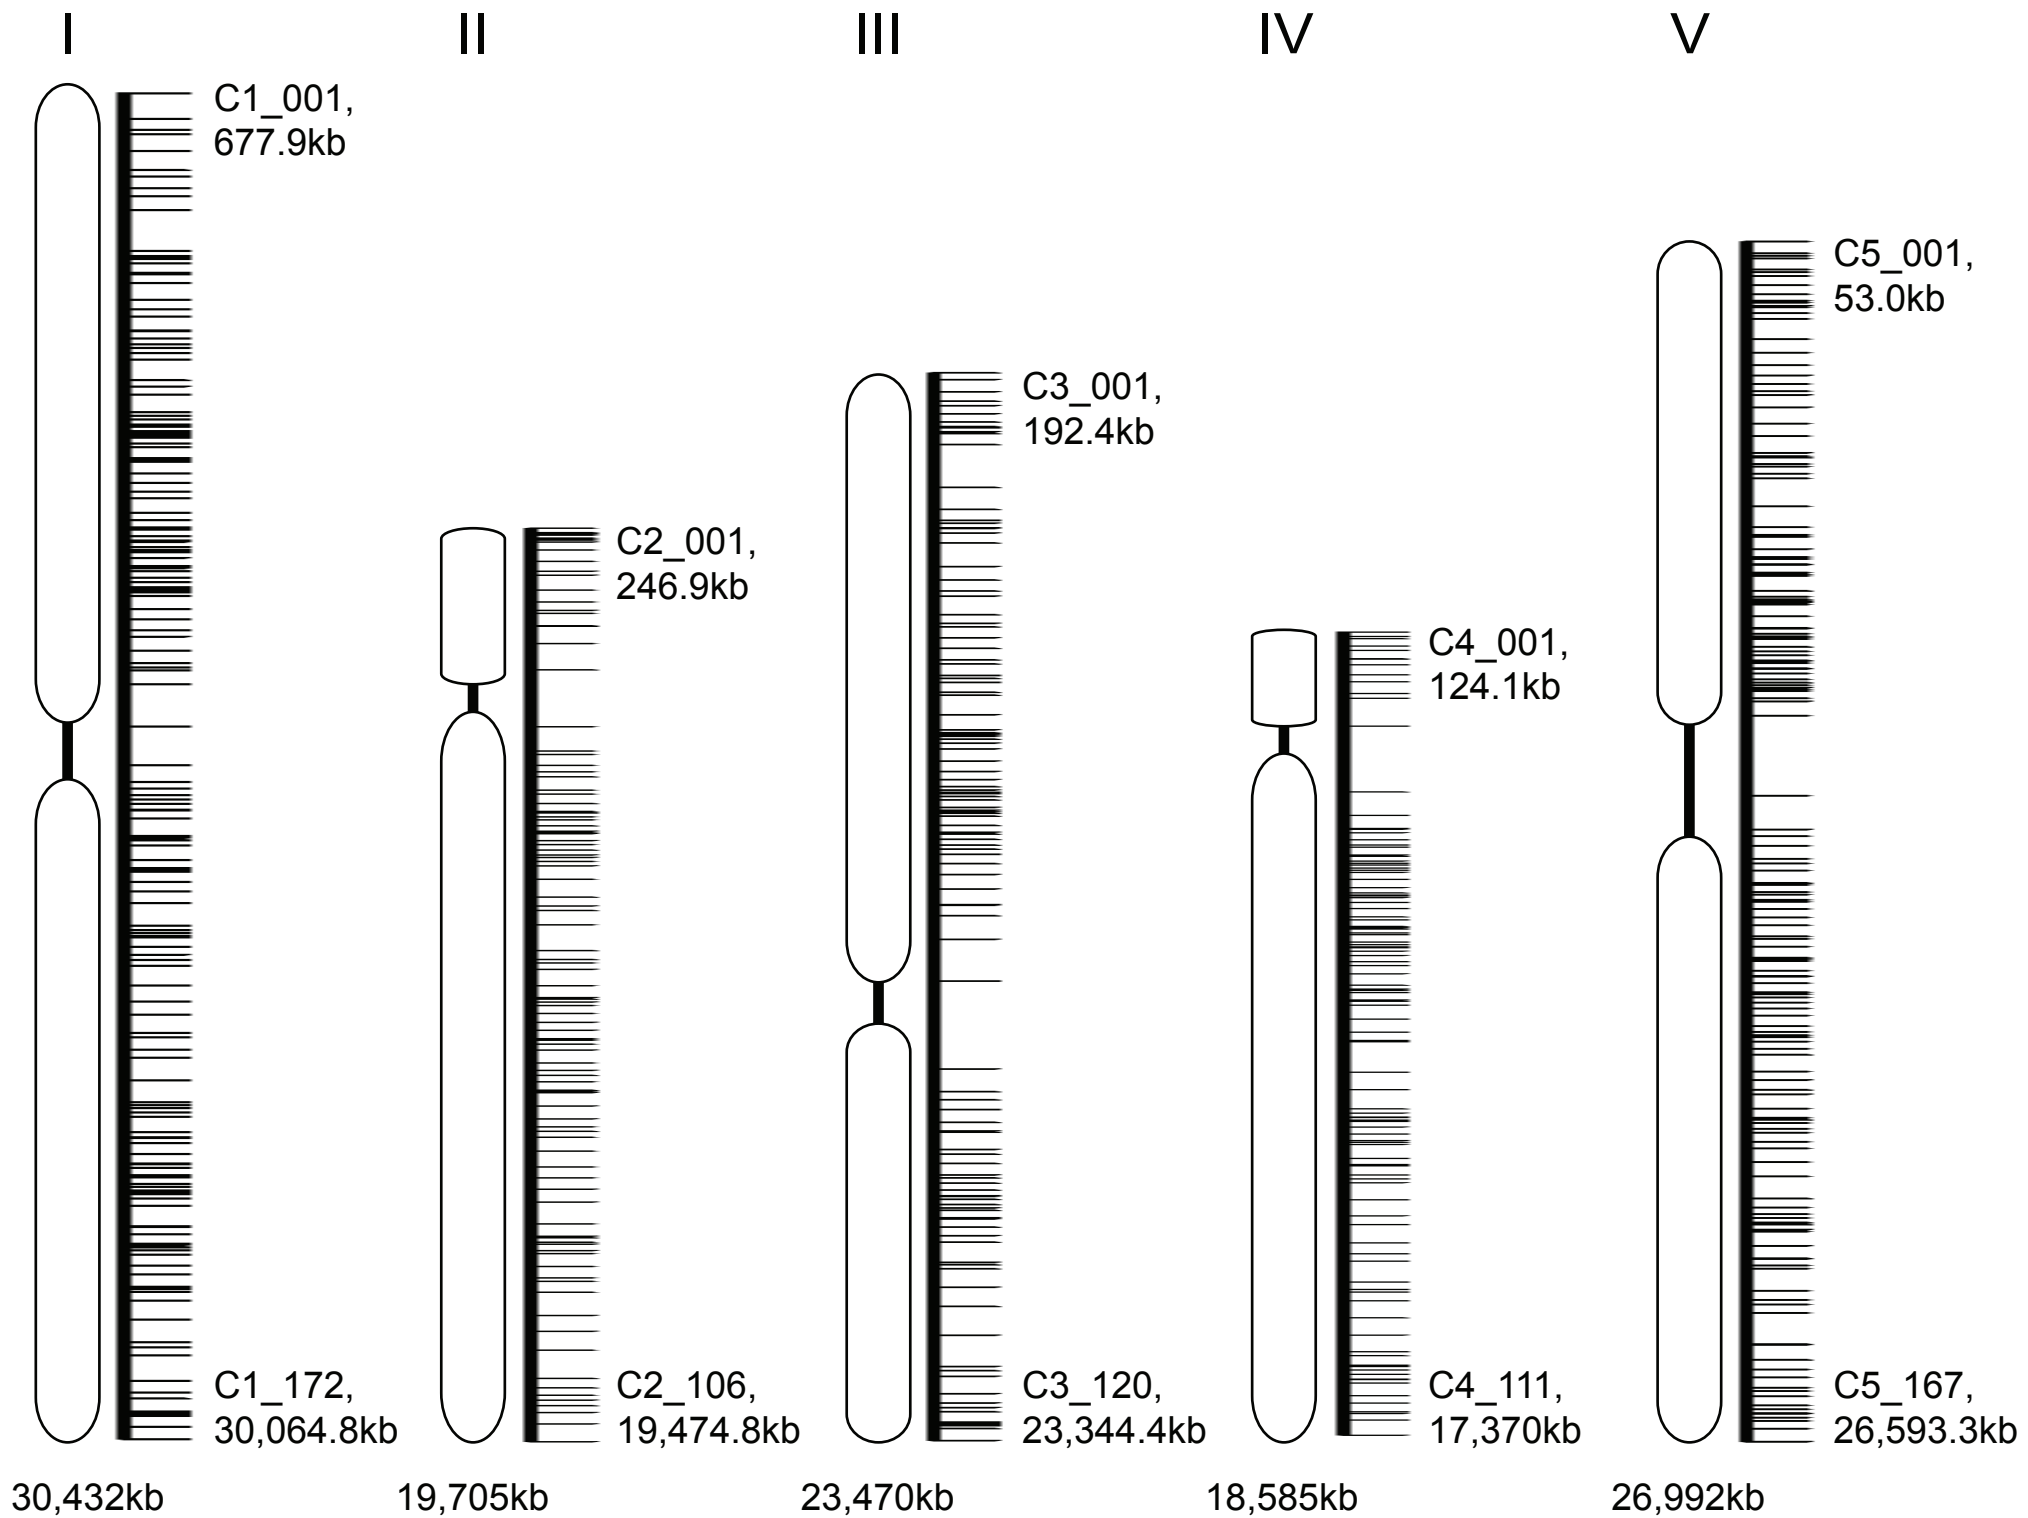

Supplemental Figure 8

Supplement: pgen.0020144.sg008.pdf [file pgen.0020144.sg008.pdf]

# Chromosome 1

A

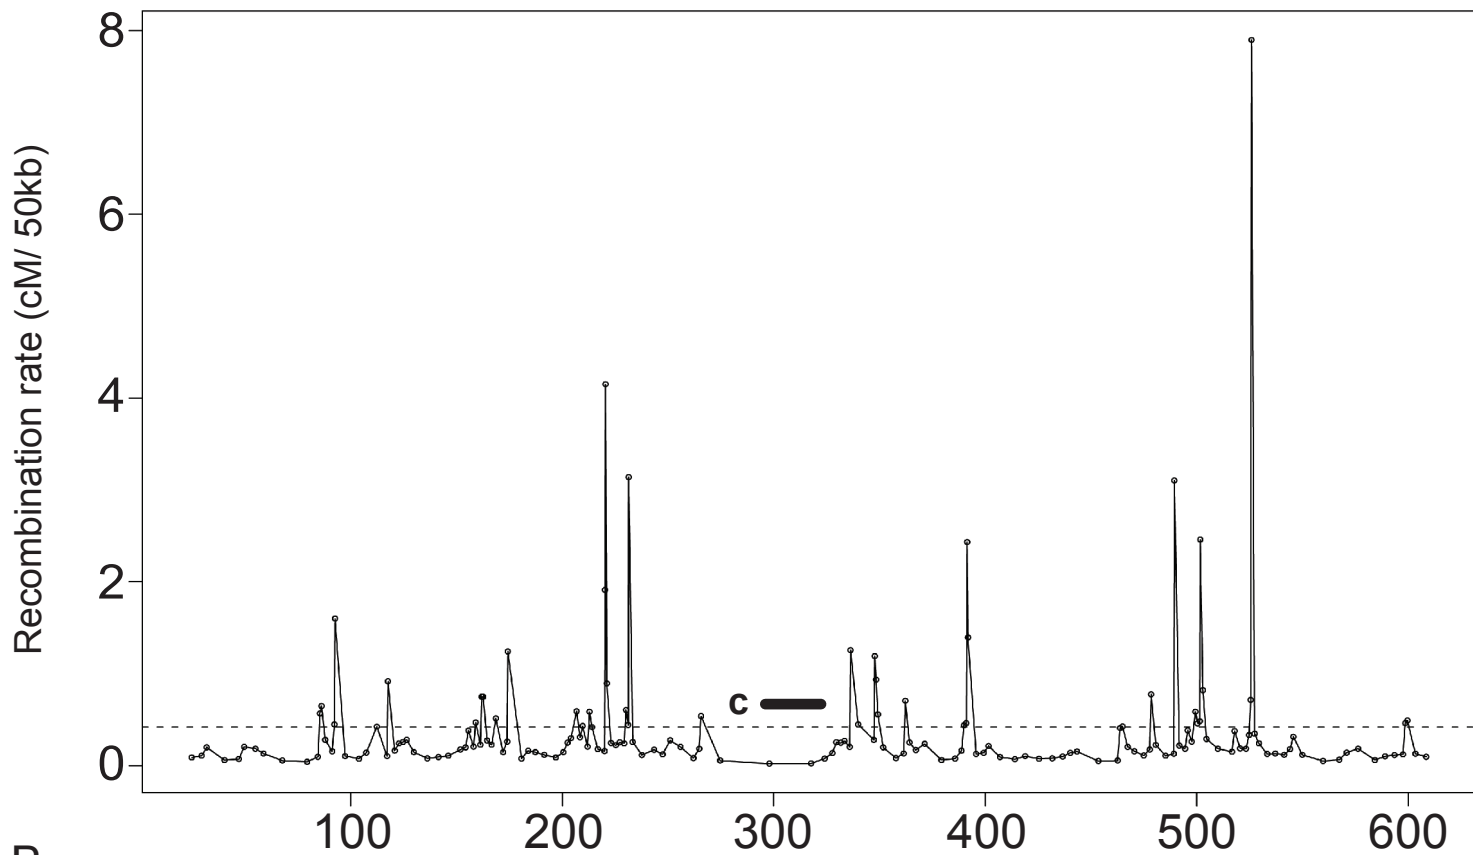

B

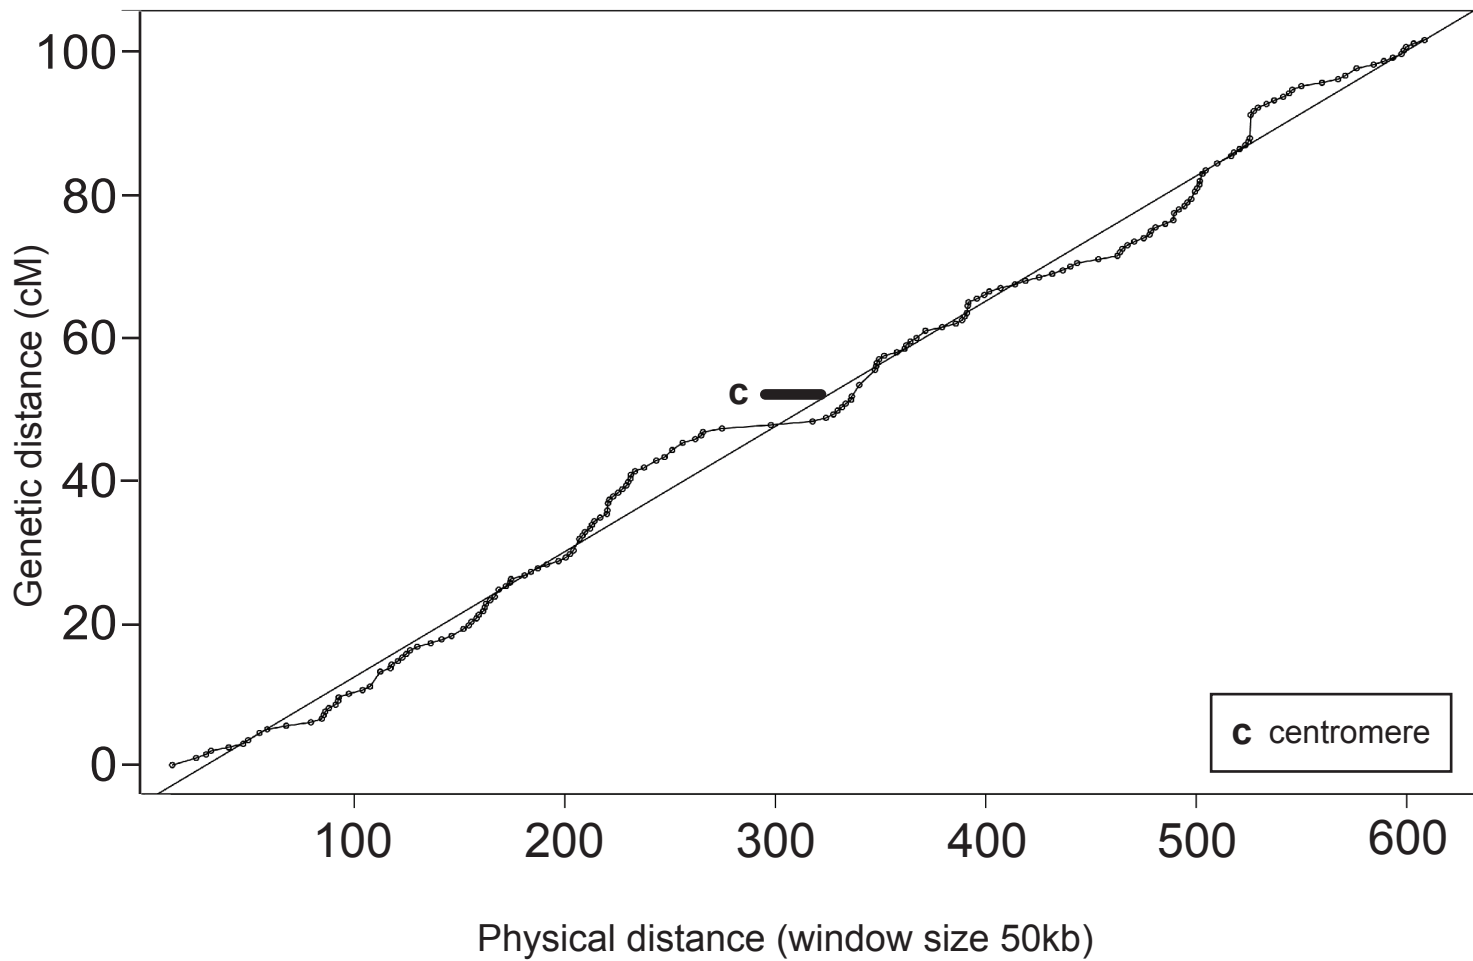

Supplement: pgen.0020144.sg009.pdf [file pgen.0020144.sg009.pdf]

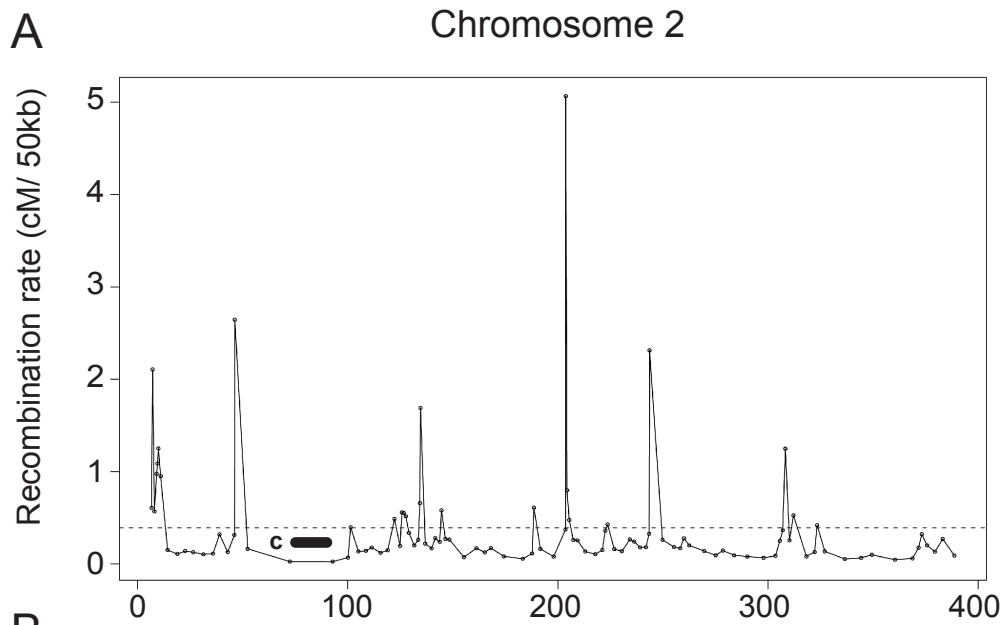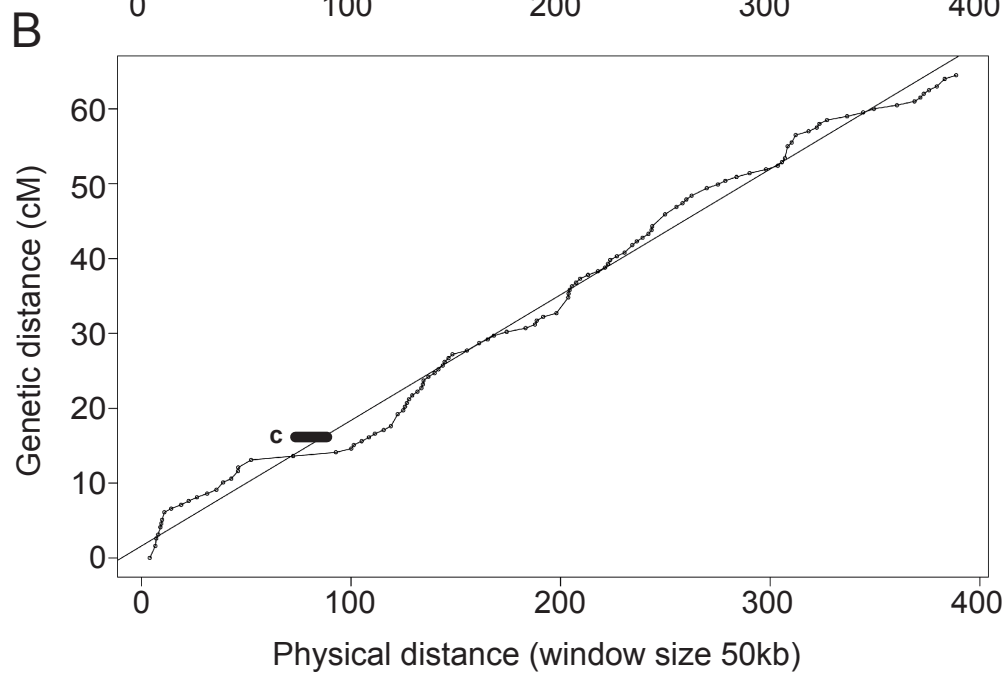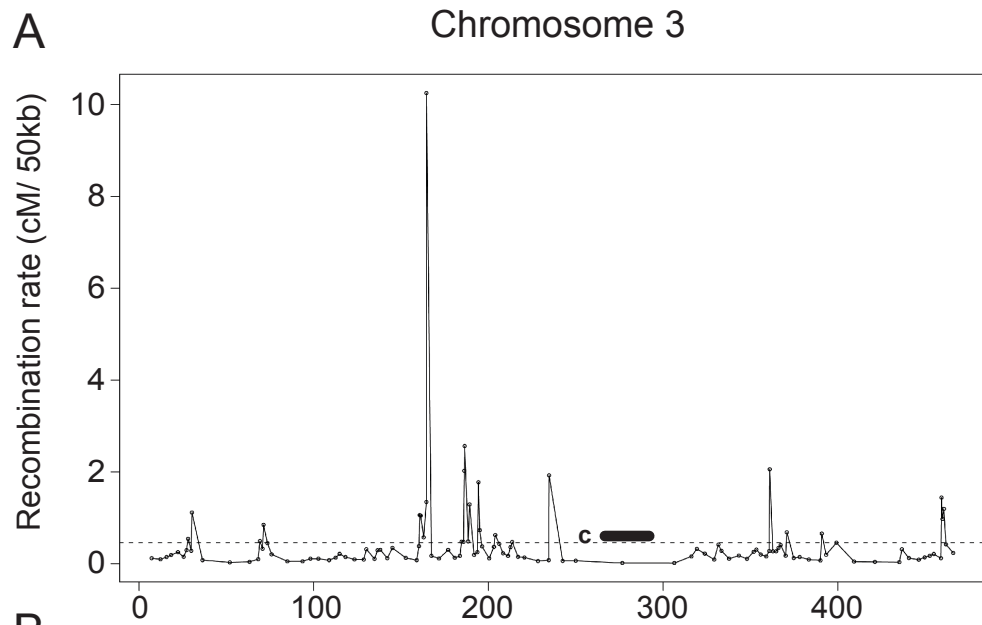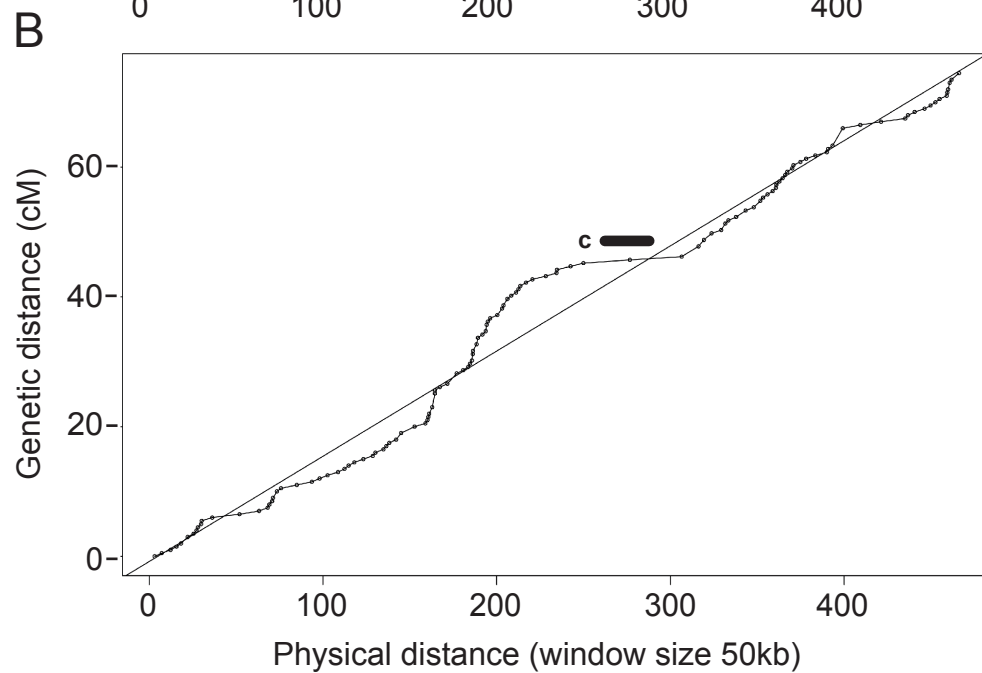

**c** centromere

Supplement: pgen.0020144.sg010.pdf [file pgen.0020144.sg010.pdf]

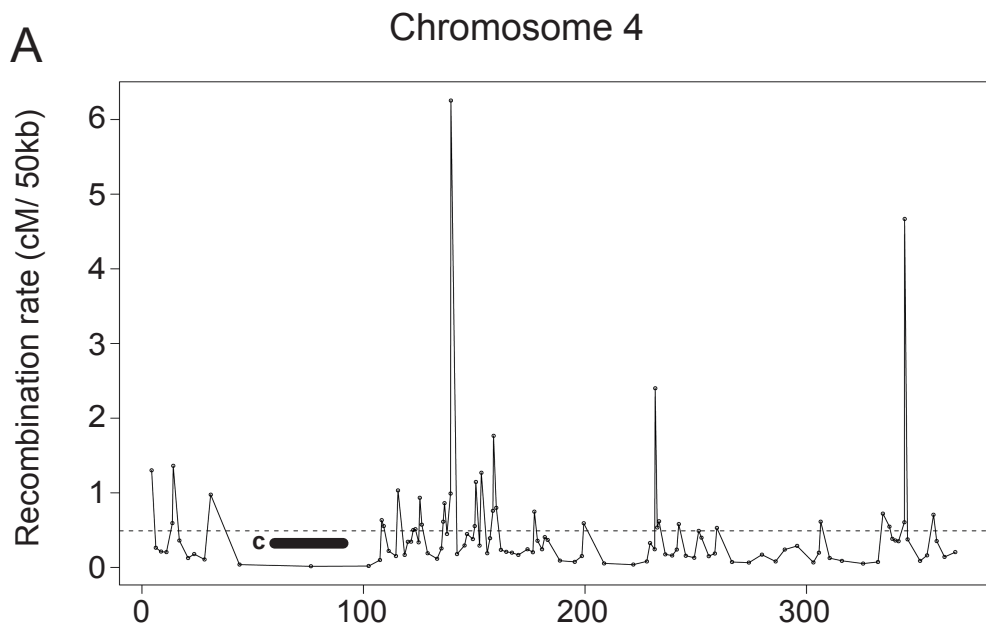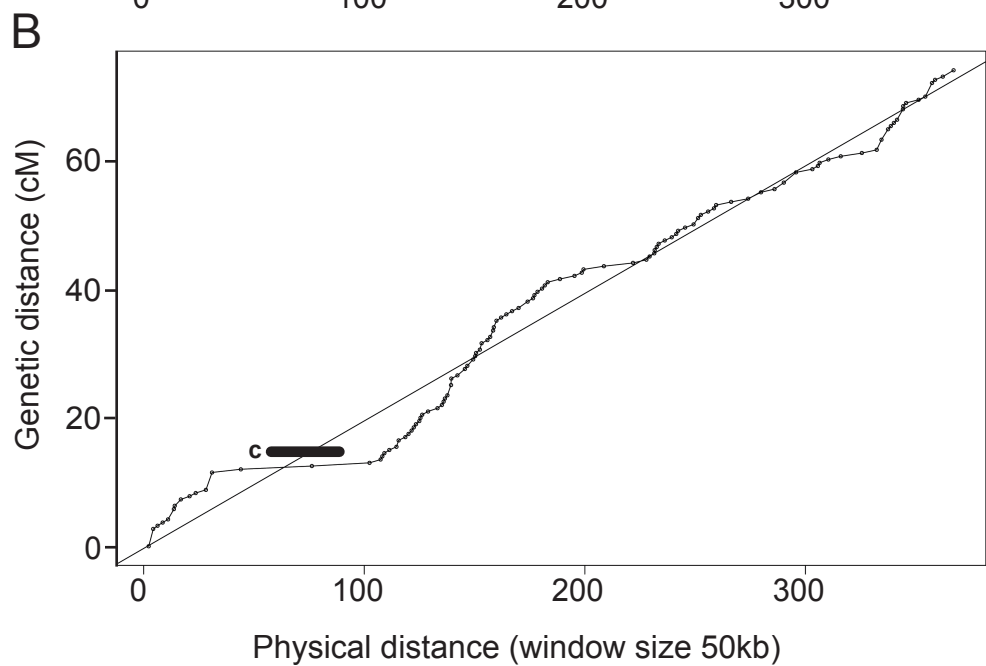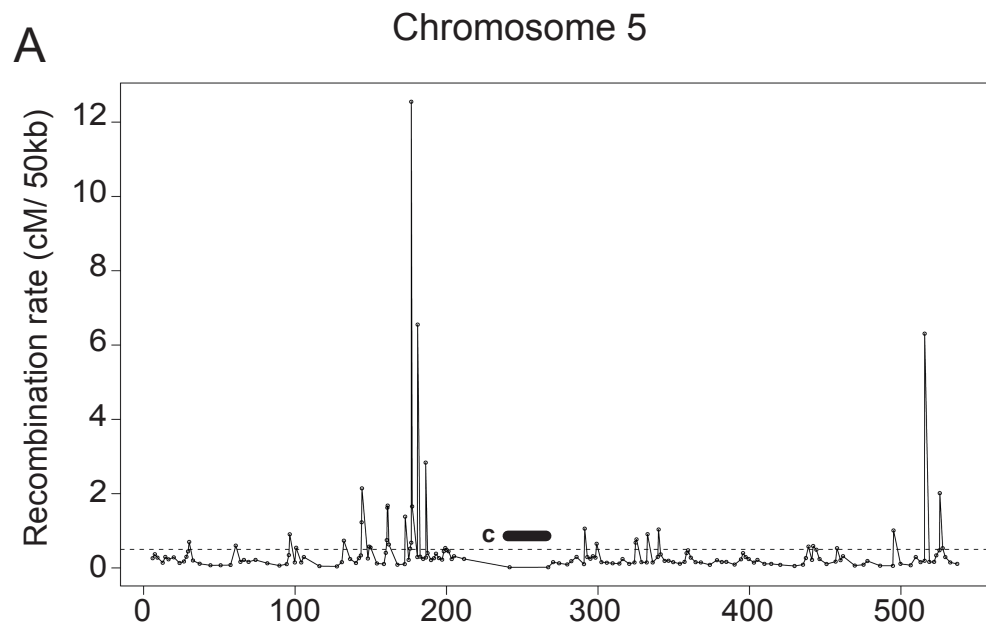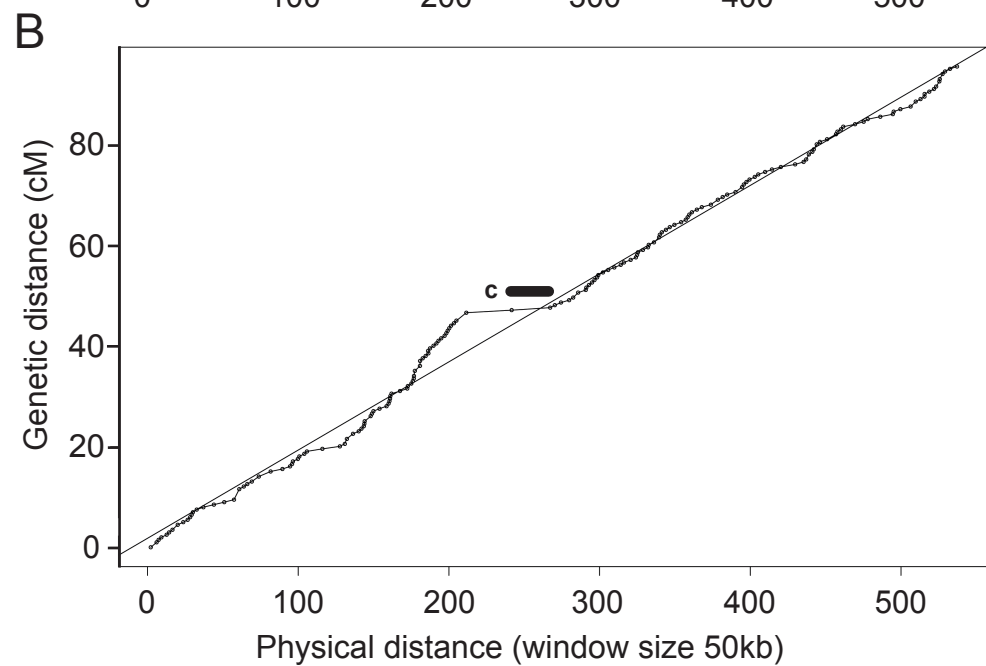

**c** centromere

Supplement: pgen.0020144.sg011.pdf [file pgen.0020144.sg011.pdf]

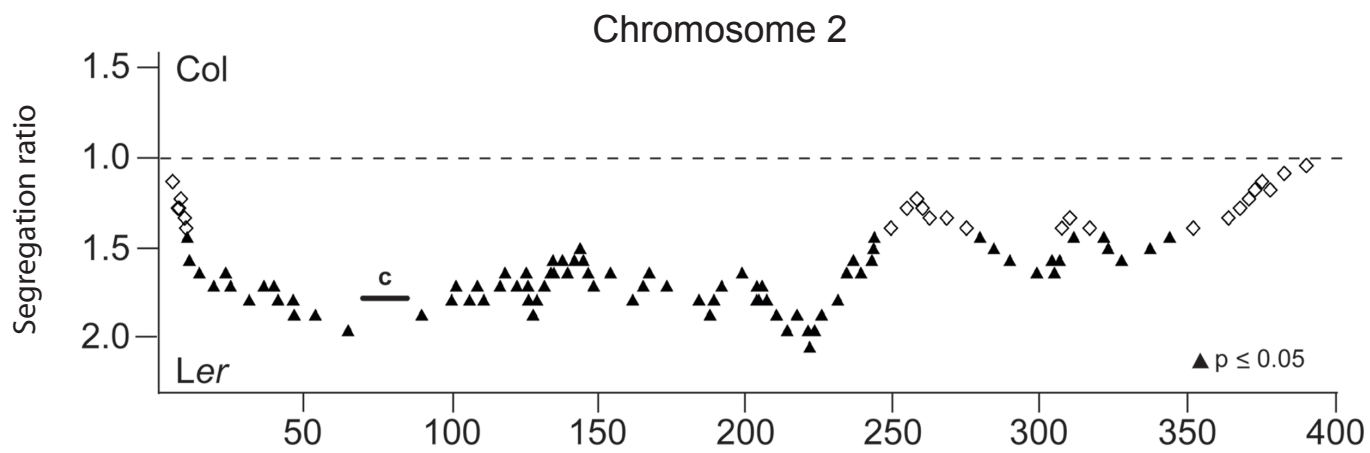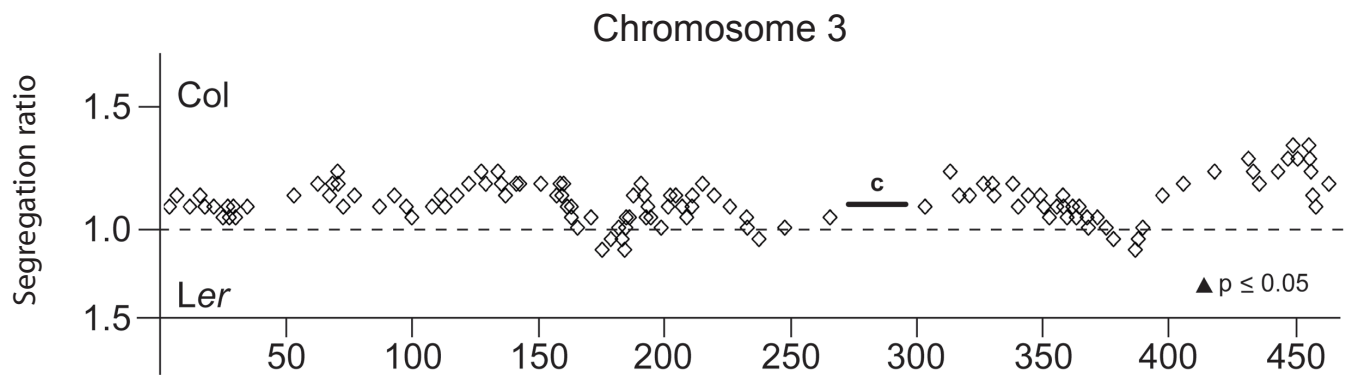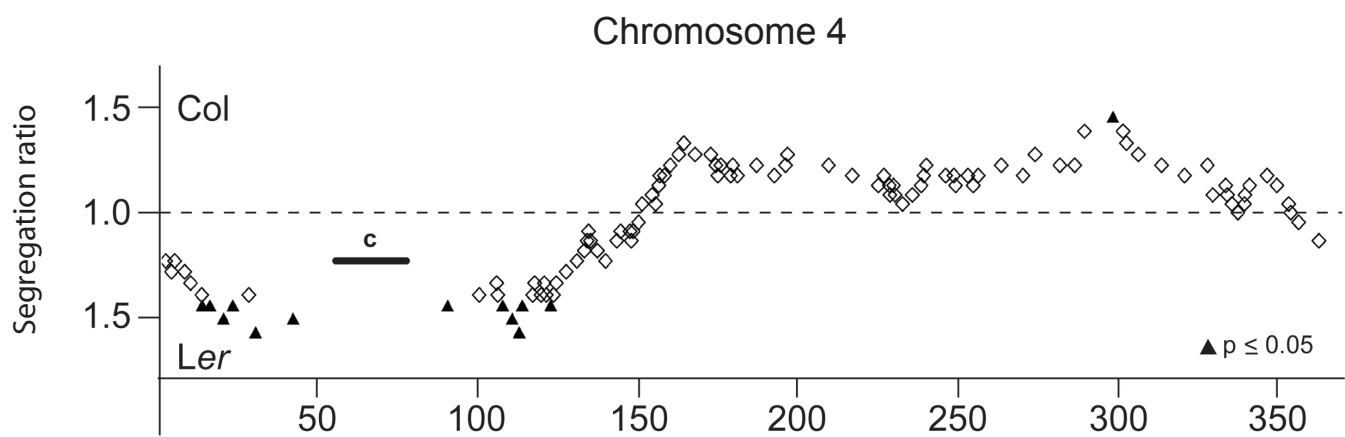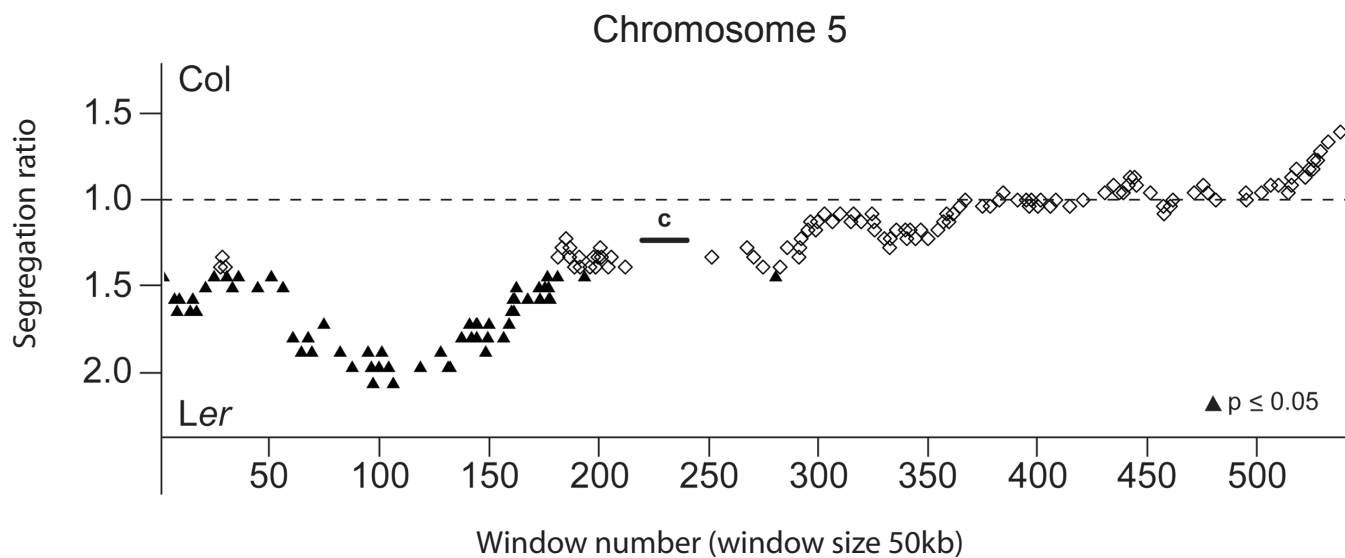

Supplemental Figure 12

Supplement: pgen.0020144.sg012.pdf [file pgen.0020144.sg012.pdf]
